# Supplementary material
Source: HighWire-hosted journal article supplement (http://rc.rcjournal.com/highwire/filestream/16330/field_highwire_adjunct_files/1/suppl_2.pdf)
Supplement: suppl_2.pdf [file suppl_2.pdf]

| Predictor Variable          | SLIP points |
|-----------------------------|-------------|
| <i>Surgical Procedure</i>   |             |
| High-risk Cardiac Surgery   | 19          |
| High-risk Vascular Surgery  | 33          |
| Low-risk Vascular Surgery   | 6           |
| High-risk Thoracic Surgery  | 15          |
| <i>Co-morbidities</i>       |             |
| Diabetes Mellitus           | 6           |
| COPD                        | 9           |
| Restrictive Lung Disease    | 5           |
| GERD                        | 7           |
| <i>Modifying Conditions</i> |             |
| Active smoking              | 4           |
| Alcohol abuse               | 11          |
| Recent chemotherapy         | 6           |

**Supplemental Table 1. Surgical Lung Injury Prediction (SLIP) score. COPD: chronic obstructive pulmonary disease. GERD: gastroesophageal reflux disease.**
